# Supplementary material
Source: publisher site journal article supplement (https://www.dovepress.com/get_supplementary_file.php?f=219063.docx)
Supplement: Supplementary file 1 [file get_supplementary_file.php]

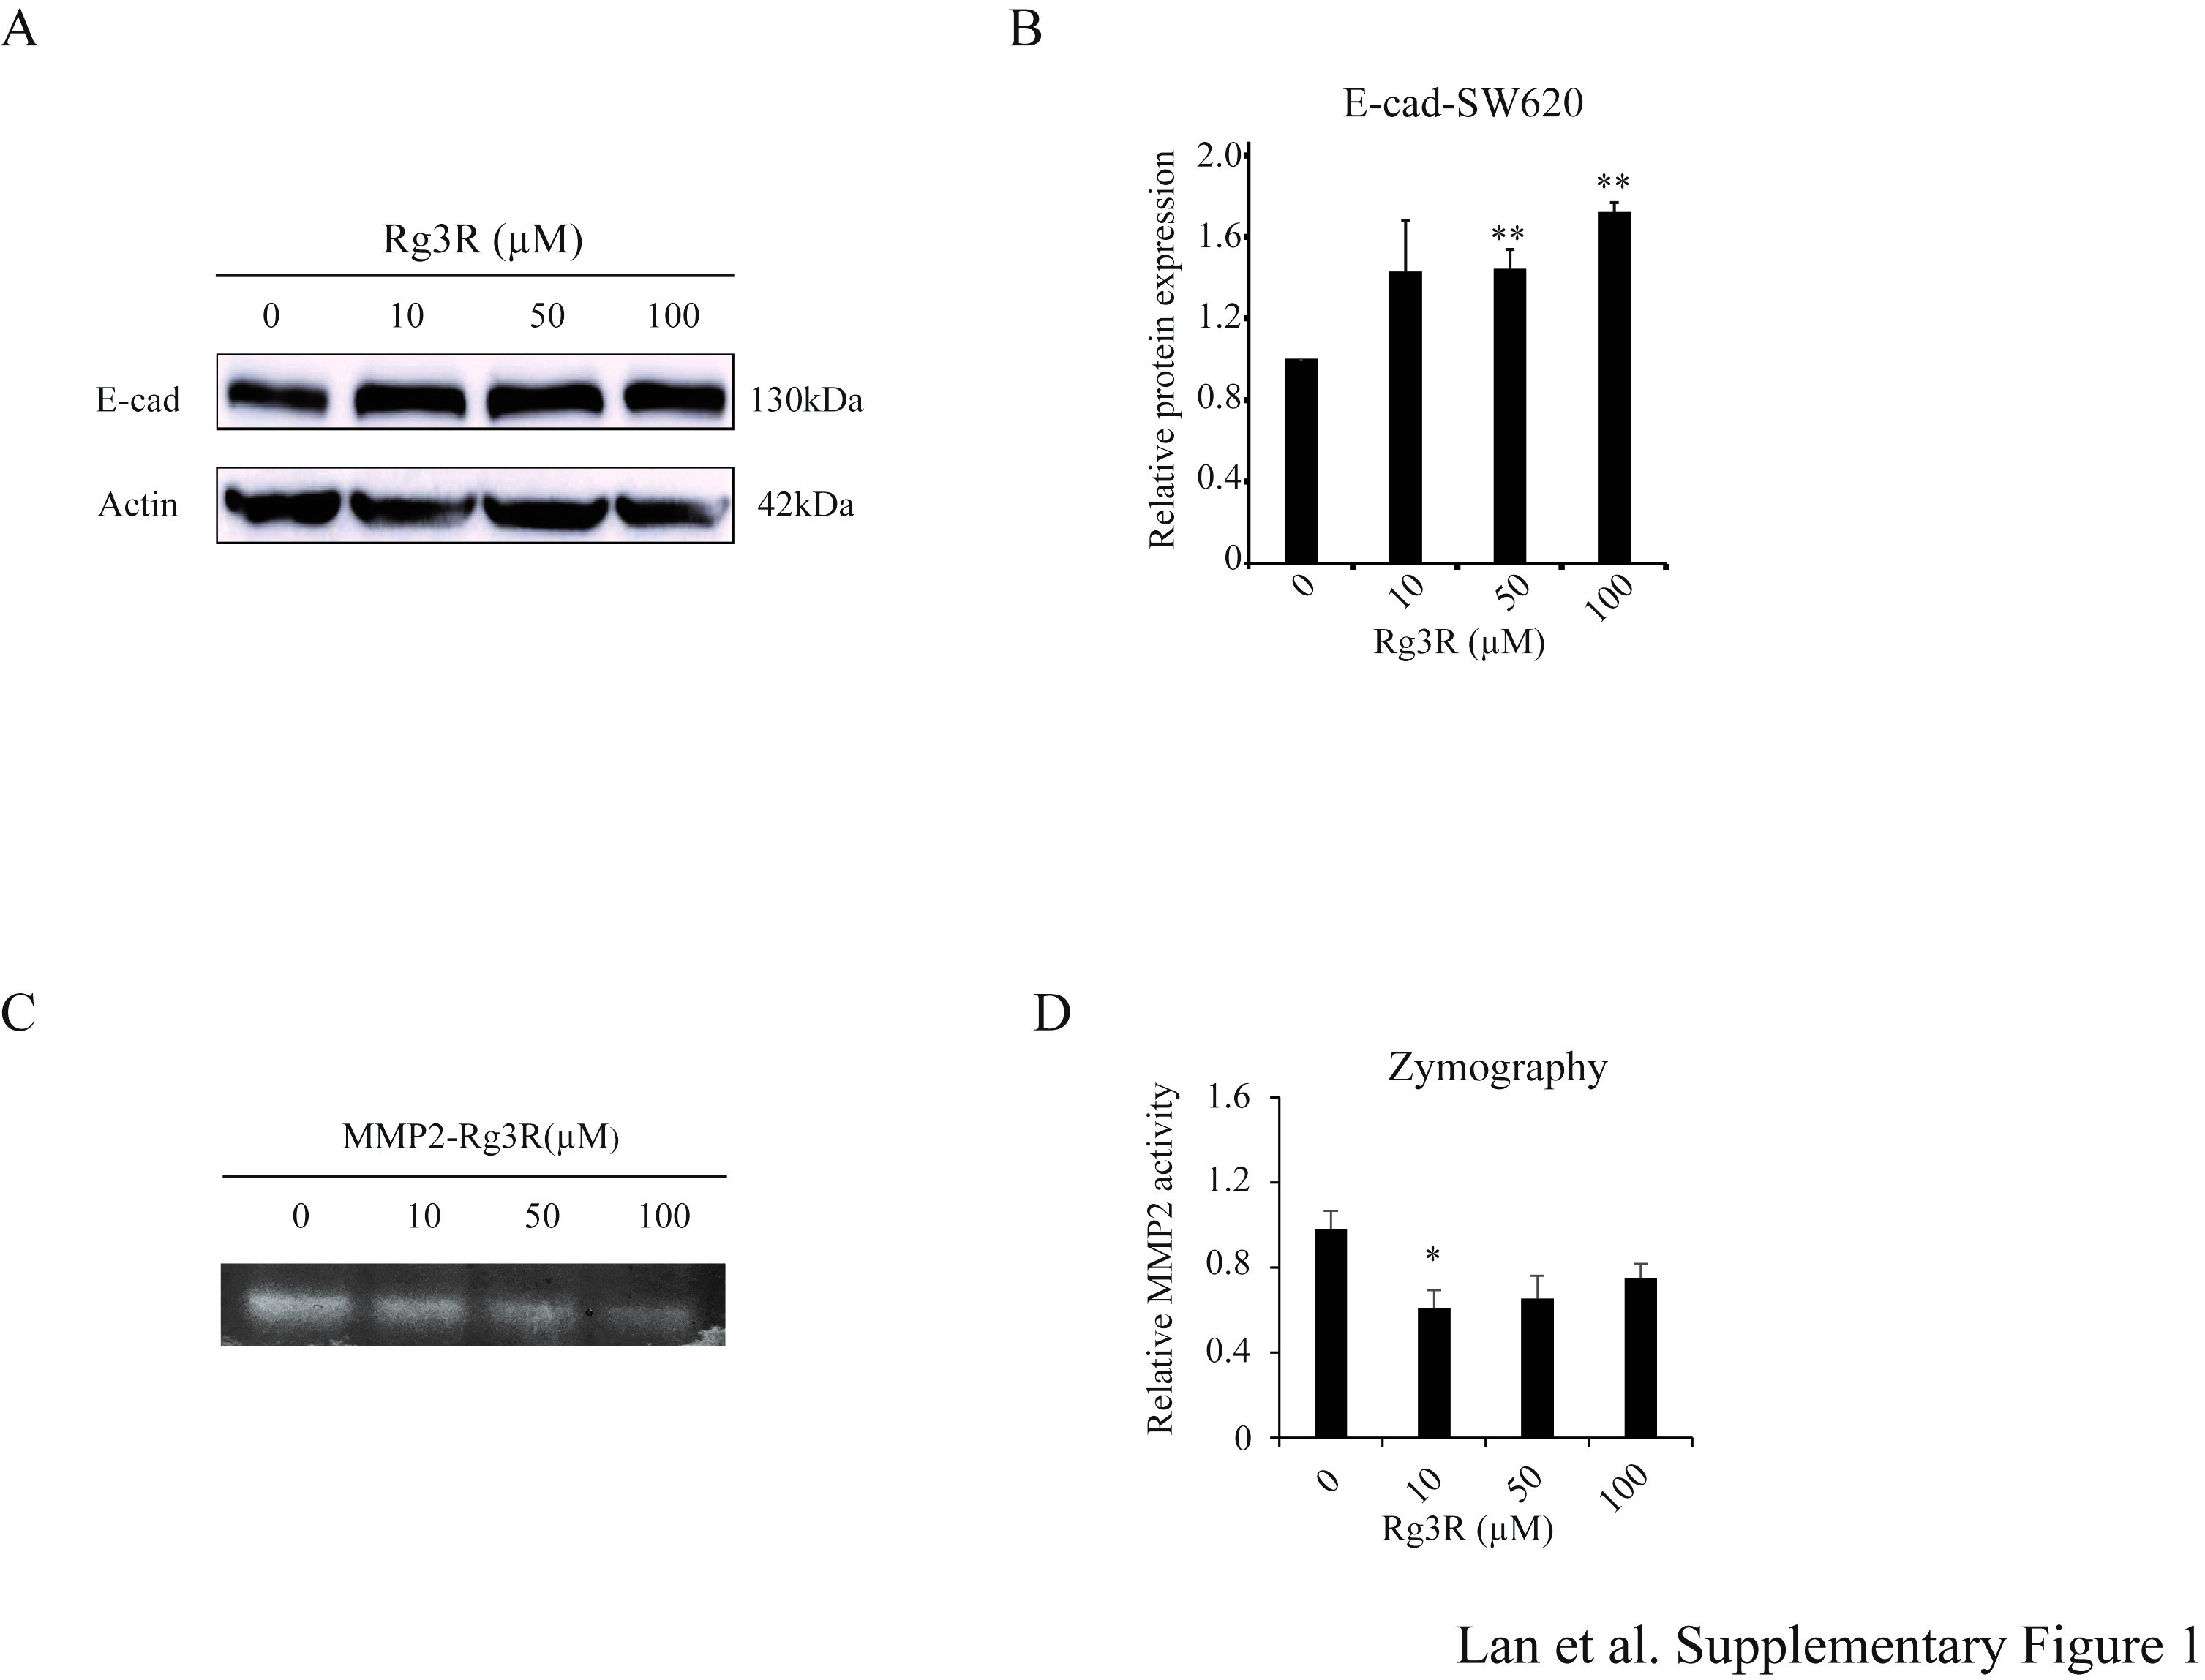


**Supplementary Figure 1. Effect of ginsenoside Rg3R on MMP2 activity in CRC cells.**

(A and B) SW620 cells were treated with ginsenoside Rg3R, and the protein levels of E-cad was determined by western blotting. ACTIN was used as a loading control. Representative images was shown (A). Values represent the relative densities of the blotting bands normalized to ACTIN (B). Data were presented as the mean ± SEM of three independent experiments (*, P< 0.05; **, P< 0.01). (C and D) MMP2 activity in SW620 cells after ginsenoside Rg3R treatment in serum-free media was detected by gelatin zymography analysis. ACTIN was used as a loading control. Values represent the relative density of the blotting bands normalized to ACTIN. The statistical analysis is shown (*, P< 0.05; **, P< 0.01). Data were presented as the mean ± SEM of three independent experiments

Supplementary Table 1. Primers used for realtime qPCR

| B2M-F | TGAAGCTGACAGCATTCGG |
| --- | --- |
| B2M-R | CTGCTGGATGACGTGAGTAAA |
| EGFR-F | GCCAAGGCACGAGTAACAAGC |
| EGFR-R | AGGGCAATGAGGACATAACC |
| SNAIL-F | CTGGGTGCCCTCAAGATGCA |
| SNAIL-R | CCGGACATGGCCTTGTAGCA |
| SOX2-F | CCTTCTTCATGAGCGTCTTG |
| SOX2-R | GATGCACAACTCGGAGATC |
| NANOG-F | AGAAGGCCTCAGCACCTA |
| NANOG-R | GGCCTGATTGTTCCAGGA |
| OCT4-F | ACATCAAAGCTCTGCAGAAAGAAC |
| OCT4-R | CTGAATACCTTCCCAAATAGAACCC |
| MMP2-F | CGCTCAGATCCGTGGTGA |
| MMP2-R | CGCCAAATGAACCGGTCCTT |
